# Supplementary material for: Demography and Behaviour of Teinopodagrion oscillans (Odonata: Megapodagrionidae) in a Protected Area of the Colombian Andean Region
Source: MDPI journal article supplement (doi:10.3390/insects15020125), 2024-02-09
Supplement: s1 [file s1]

# Supplementary material

**Table S1.** Results of model selection for *T. oscillans*. Survival rate is denoted by *Phi* and recapture probability by *p*. The group is sex (*g*) and time variation is indicated by *t*. The best model (in bold) includes variation due to time of recapture and survival.

| Model                | QAICc          | Delta QAICc | AICc Weights | Model Likelihood | Num. Par   | QDeviance      |
|----------------------|----------------|-------------|--------------|------------------|------------|----------------|
| <b>{Phi(t) p(t)}</b> | <b>5912.62</b> | <b>0.00</b> | <b>1</b>     | <b>1</b>         | <b>146</b> | <b>4790.41</b> |
| {Phi(t) p(.)}        | 5938.56        | 25.95       | 0            | 0                | 75         | 4979.50        |
| {Phi(t) p(g)}        | 5944.01        | 31.39       | 0            | 0                | 80         | 4973.94        |
| {Phi(g*t) p(g*t)}    | 5981.22        | 68.61       | 0            | 0                | 337        | 4333.29        |
| {Phi(.) p(t)}        | 6230.29        | 317.68      | 0            | 0                | 75         | 5271.23        |
| {Phi(g) p(t)}        | 6237.26        | 324.65      | 0            | 0                | 80         | 5267.19        |
| {Phi(.) p(.)}        | 6426.83        | 514.22      | 0            | 0                | 2          | 5620.96        |
| {Phi(g) p(.)}        | 6431.85        | 519.24      | 0            | 0                | 7          | 5615.91        |
| {Phi(.) p(g)}        | 6433.26        | 520.64      | 0            | 0                | 7          | 5617.32        |
| {Phi(g) p(g)}        | 6438.21        | 525.60      | 0            | 0                | 12         | 5612.15        |
| {Phi(t) p(g*t)}      | 6591.69        | 679.08      | 0            | 0                | 482        | 4430.90        |
| {Phi(g*t) p(.)}      | 6652.85        | 740.24      | 0            | 0                | 382        | 4858.20        |
| {Phi(g*t) p(g)}      | 6665.42        | 752.81      | 0            | 0                | 387        | 4853.83        |
| {Phi(g*t) p(t)}      | 6692.13        | 779.51      | 0            | 0                | 449        | 4658.84        |
| {Phi(.) p(g*t)}      | 6838.59        | 925.97      | 0            | 0                | 429        | 4879.25        |
| {Phi(g) p(g*t)}      | 6848.43        | 935.81      | 0            | 0                | 434        | 4870.84        |
